# Supplementary material for: Recent Progress of Solid Lipid Nanoparticles and Nanostructured Lipid Carriers as Ocular Drug Delivery Platforms
Source: MDPI journal article supplement (doi:10.3390/ph16030474), 2023-03-22
Supplement: s1 [file s1]

*Supplementary file*

*for*

## Recent progress of solid lipid nanoparticles and nanostructured lipid carriers as ocular drug delivery platform

Table S1. Solid lipid nanoparticles and nanostructured lipid carriers in clinical trials (terminated studies and studies with unknown status are excluded)

| Clinical trial Identifier | Study Title                                                                                                                                  | Nanocarrier                   | Drug                                                                                     | Indication                                                                                                                                                                                                                    | Status            |
|---------------------------|----------------------------------------------------------------------------------------------------------------------------------------------|-------------------------------|------------------------------------------------------------------------------------------|-------------------------------------------------------------------------------------------------------------------------------------------------------------------------------------------------------------------------------|-------------------|
| NCT03823040               | Clinical assessment of oxiconazole nitrate solid lipid nanoparticles loaded gel                                                              | SLNs                          | Oxiconazole nitrate                                                                      | Tinea                                                                                                                                                                                                                         | Phase 1 completed |
| NCT04803500               | Simvastatin around immediate implant                                                                                                         | SLNs/gel                      | Simvastatin                                                                              | Immediate implant placement<br>Bone regeneration<br>Alveolar bone resorption                                                                                                                                                  | Phase 2 completed |
| NCT05267899               | A phase I first in human study to evaluate the safety, tolerability, and pharmacokinetics of wgi-0301 in patients with advanced solid tumors | Lipid nanoparticle suspension | WGI-0301                                                                                 | Advanced solid tumors                                                                                                                                                                                                         | Recruiting        |
| NCT03739931               | Dose escalation study of mrna-2752 for intratumoral injection to participants in advanced malignancies                                       | Lipid nanoparticle            | mRNA-2752/<br>mRNA-2752+<br>Durvalumab                                                   | Dose escalation: relapsed/refractory solid tumor malignancies or lymphoma<br>Dose expansion: triple negative breast cancer, hnscc, non-hodgkins, urothelial cancer, immune checkpoint refractory melanoma, and nsclc lymphoma | Recruiting        |
| NCT04675996               | First-in-human study of int-1b3 in patients with advanced solid tumors                                                                       | Lipid nanoparticle            | INT-1B3                                                                                  | Solid tumor                                                                                                                                                                                                                   | Recruiting        |
| NCT05497453               | A phase 1/2 study to evaluate otx-2002 in patients with hepatocellular carcinoma and other solid tumor                                       | Lipid nanoparticle            | OTX-2002/<br>OTX-2002<br>+Tyrosine kinase inhibitor One/<br>OTX-2002<br>+Tyrosine kinase | Hepatocellular carcinoma<br>Solid tumor Hepatocellular carcinoma non-resectable<br>Hepatocellular carcinoma recurrent Hepatocellular cancer                                                                                   | Recruiting        |

|                 | types known for<br>association with the<br>MYC oncogene                     |      | inhibitor Two/<br>OTX-2002 +<br>Checkpoint<br>Inhibitor,<br>Immune            | Liver cancer<br>Liver, cancer of, non-resectable |            |
|-----------------|-----------------------------------------------------------------------------|------|-------------------------------------------------------------------------------|--------------------------------------------------|------------|
|                 |                                                                             | NLCs | AAHI-SC2<br>Vaccine/<br>AAHI-SC3<br>Vaccine/<br>EUA or<br>approved<br>vaccine | COVID-19                                         | Recruiting |
| NCT05370<br>040 | THEMBA II T-Cell<br>Vaccine: Vaccination<br>with saRNA COVID-19<br>vaccines |      |                                                                               |                                                  |            |
